# Supplementary material
Source: PubMed Central journal article supplement (PMC2582286)
Supplement: 0805027105_0805027105SI.pdf [file 0805027105_0805027105SI.pdf]

# Supporting Information

Neumann *et al.* 10.1073/pnas.0805027105

## SI Text

**Chemical Synthesis of the Alpha-Peptide.** The synthesis of the 23mer alpha-peptide (*Ec*POX<sub>550-572</sub>, H-Met-Leu-Arg-Ala-Ile-Ile-Ser-Gly-Arg-Gly-Asp-Glu-Val-Ile-Glu-Leu-Ala-Lys-Thr-Asn-Trp-Leu-Arg-OH) was carried out using an ABI 443A peptide synthesizer running standard Fmoc-chemistry in a 0.125-mmol scale. The attachment of the first amino acid to 2-chlorotritylchlorid resin was carried out using an established protocol [Barlos K, *et al.* (1989) Synthesis of Protected Peptide-Fragments Using Substituted Triphenylmethyl Resins. *Tetrahed Lett* 30:3943-3946]. For the following double coupling steps 4 eq amino acid, 4 eq HCTU (2-(6-Chloro-1H-benzotriazole-1-yl)-1,1,3,3-tetramethylammonium hexafluoro-phosphate), 4 eq HOBt

(4-hydroxybenzotriazole) and 8 eq DIPEA (*N,N*-diisopropylethylamine) in DMF (*N,N*-dimethylformamide) were used. The *N*-terminal Fmoc-protection group was cleaved with a solution of 2% piperidine/2% DBU (1,8-Diaza-bicyclo[5.4.0]-7-undecene) in DMF. After complete synthesis the simultaneous cleavage of the peptide from the resin and side chain deprotection were done by a mixture of 5% TIS (triisopropylsilane), 5% water and 90% TFA (trifluoroacetic acid) for 3 h at room temperature. After evaporation of the solvent the peptide was precipitated by ice-cold diethylether. The crude product was washed with diethylether, filtered and purified via preparative HPLC using a C18 column employing a water/acetonitrile gradient (with 0.1% TFA) from 5-35% over 80 min. Correct synthesis was confirmed by mass spectrometry. The total yield of the pure product was 16 mg.

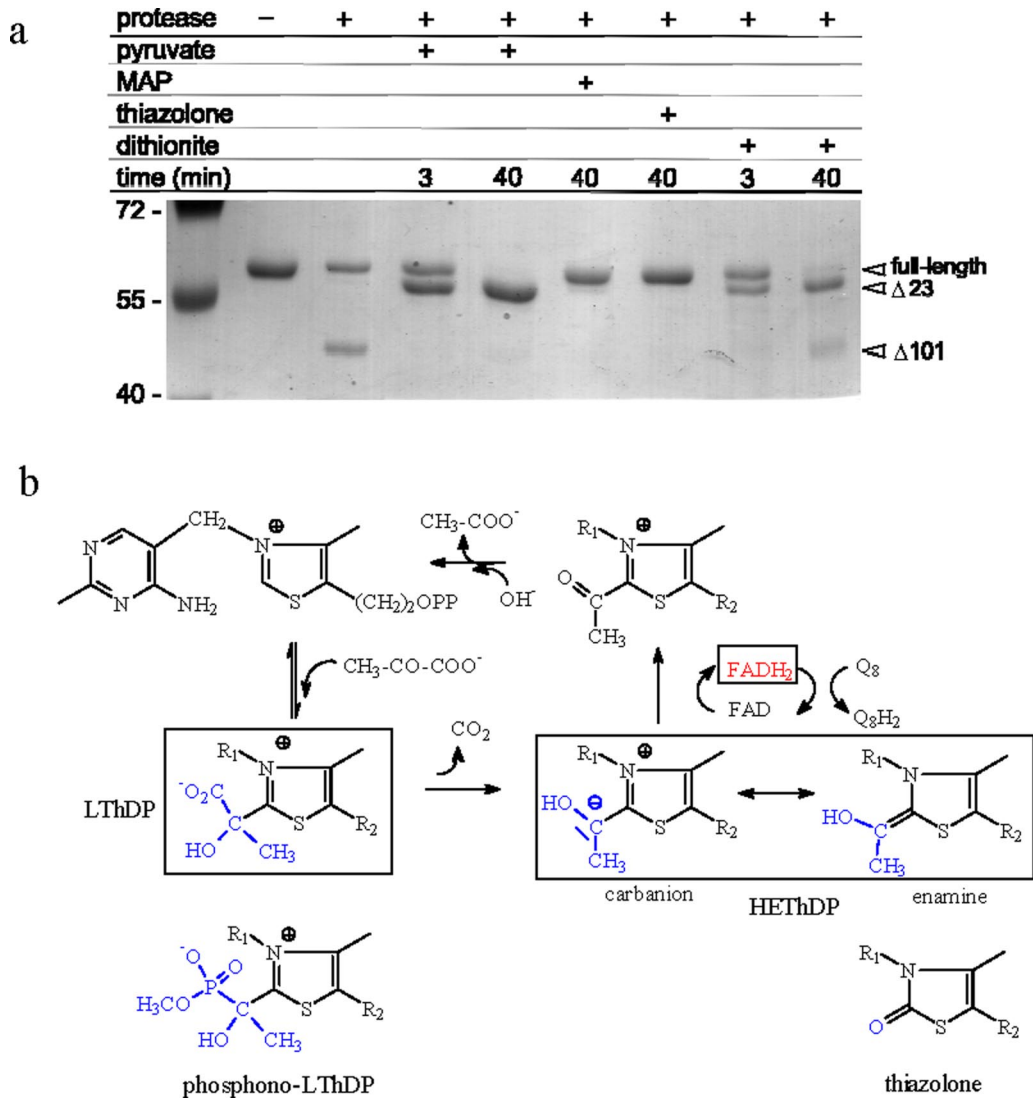

**Fig. S1.** (a) SDS-page analysis of EcPOX after treatment with alpha-chymotrypsin at different catalytic stages. Conditions for limited proteolysis were as detailed by Hager and coworkers [Recny MA, Hager LP (1983) Isolation and characterization of the protease-activated form of pyruvate oxidase. *J Biol Chem* 258: 5189–5195]. EcPOX was subjected to proteolytic digestion (i) in the resting state, (ii) after reaction with 200 mM pyruvate, (iii) after reaction with 20 mM methylacetyl-phosphonate (MAP, a substrate analog) resulting in the formation of the stable predecarboxylation intermediate analog phosphono-LThDP, (iv) after reconstitution with 100  $\mu\text{M}$  thiamin thiazolone diphosphate (an analog of the HETHDP enamine), and (v) after complete reduction with sodium dithionite under strict anaerobic conditions. (b) Catalytic cycle of EcPOX with native intermediates and corresponding intermediate analogs indicated.

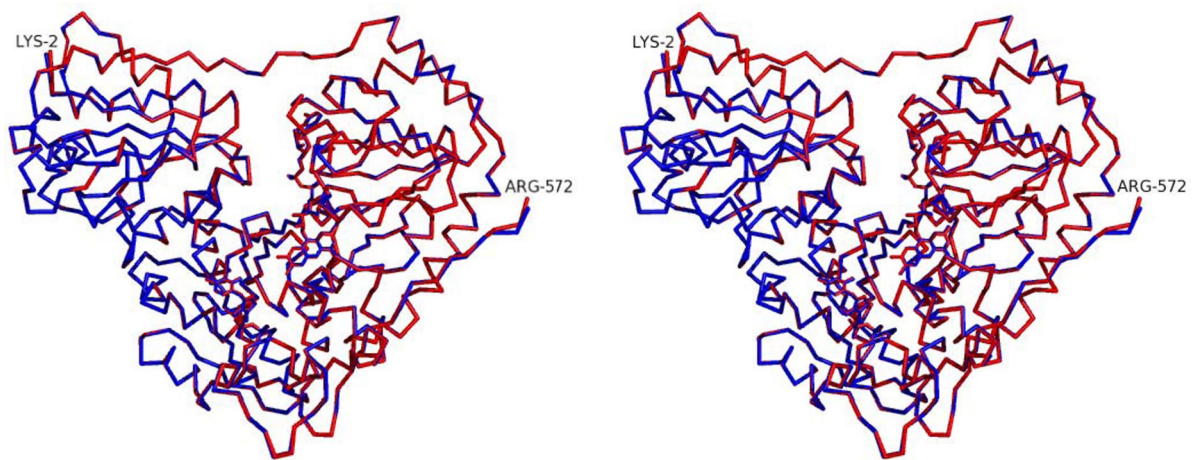

**Fig. S2.** Superposition of both subunits in the asymmetric unit of full-length *EcPOX* in stereoview and ribbon representation. Chains A and B are shown in blue and red, respectively. The cofactors ThDP and FAD are depicted in stick representation.

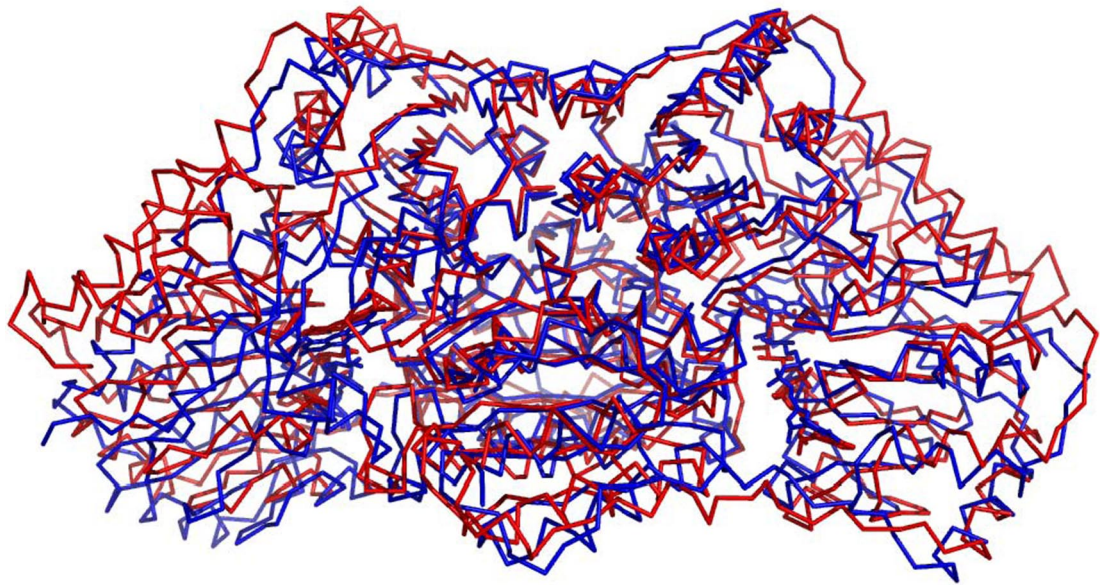

Fig. S3. Superposition of the catalytic dimers of *LpPOX* (red) and *EcPOX* (blue) reveals a similar overall fold of both proteins.

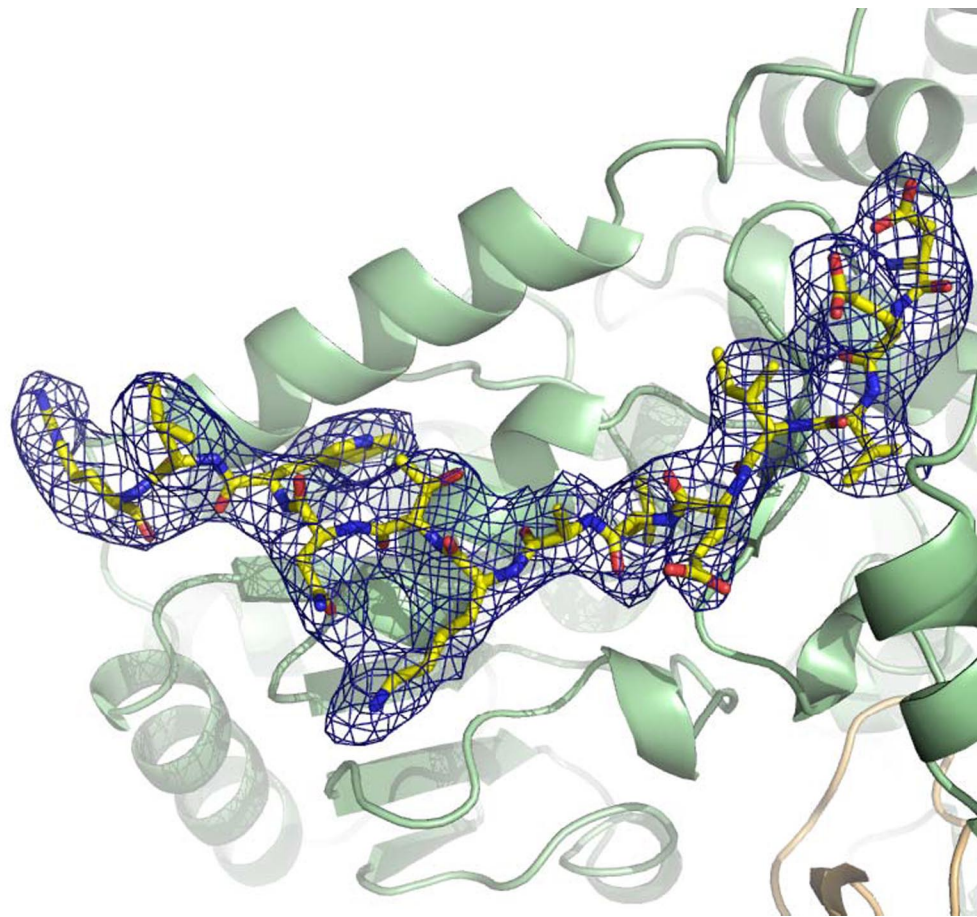

**Fig. S4.** Structure of the C terminus of full-length *EcPOX* in diagram representation displaying electron density for the last C-terminal 13 residues (shown as sticks) at a contour level of  $3\sigma$  in a  $F_o-F_c$  omit map.

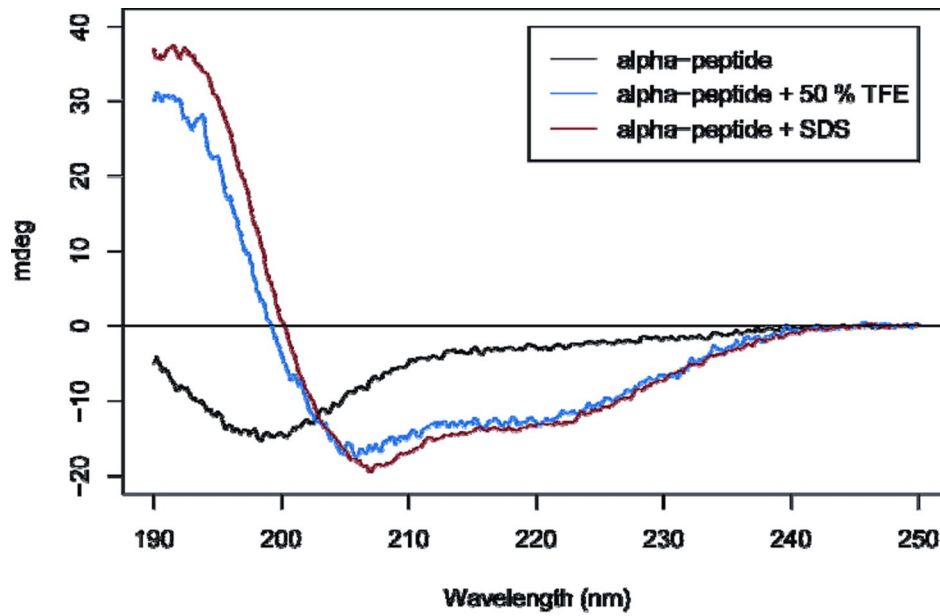

**Fig. S5.** Far-UV CD spectra of 50  $\mu$ M alpha-peptide (*Ec*POX<sub>550-572</sub>) in 20 mM potassium phosphate buffer pH 6.0 without further additives (black line), and in presence of either 100 mM SDS (brown line) or 50% trifluoroethanol (blue line). The spectra shown were recorded at 20°C and an optical path length of 10 mm at a Jasco J-810 CD spectrometer.

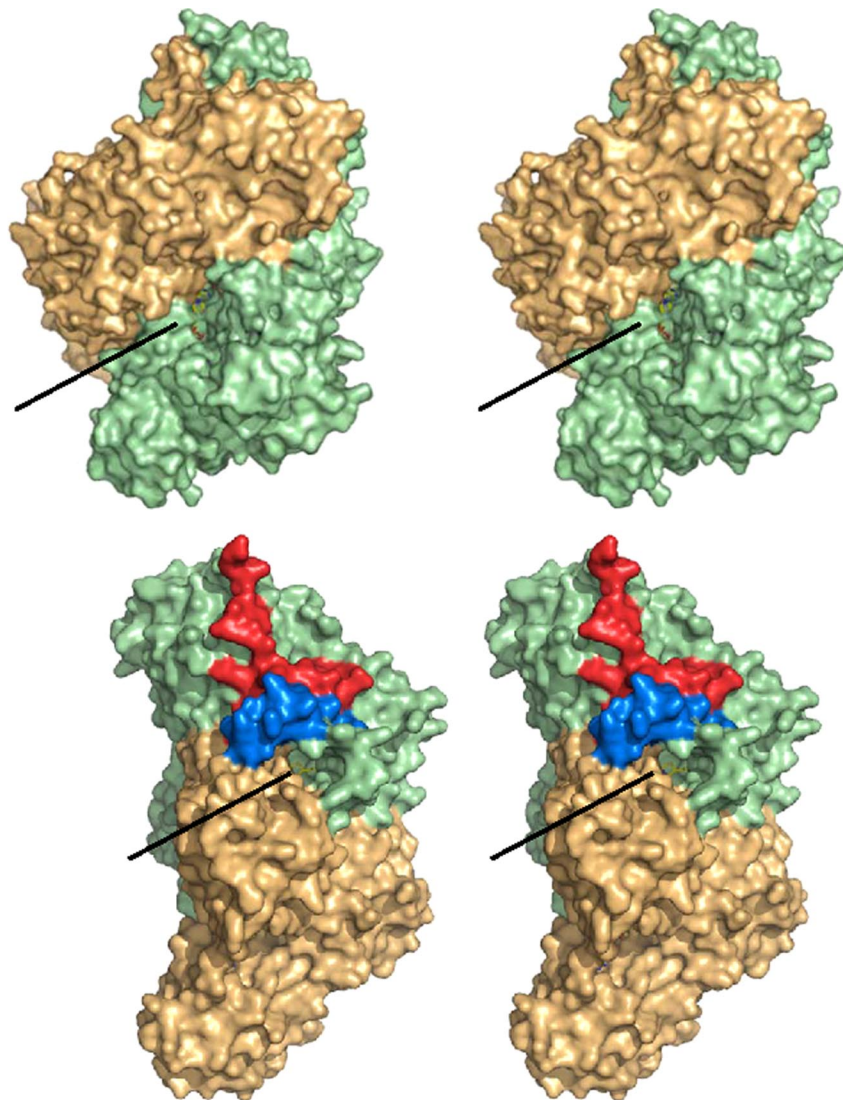

**Fig. S6.** Surface representation of pyruvate dehydrogenase E1 component from *E. coli* (Top) [Arjunan P, *et al.* (2002) Structure of the pyruvate dehydrogenase multienzyme complex E1 component from *Escherichia coli* at 1.85 Å resolution. *Biochemistry* 41: 5213–5221] and EcPOX (Bottom) viewed down the substrate channel. The corresponding subunits of the dimers are coloured individually and the entrance to the active site at the dimer interface is indicated. For EcPOX, the linker region (blue) and the AP (red) of the C terminus are highlighted. In both enzymes, the active sites are located at the bottom of a long funnel-shaped substrate channel.

# FULL-LENGTH EcPOX

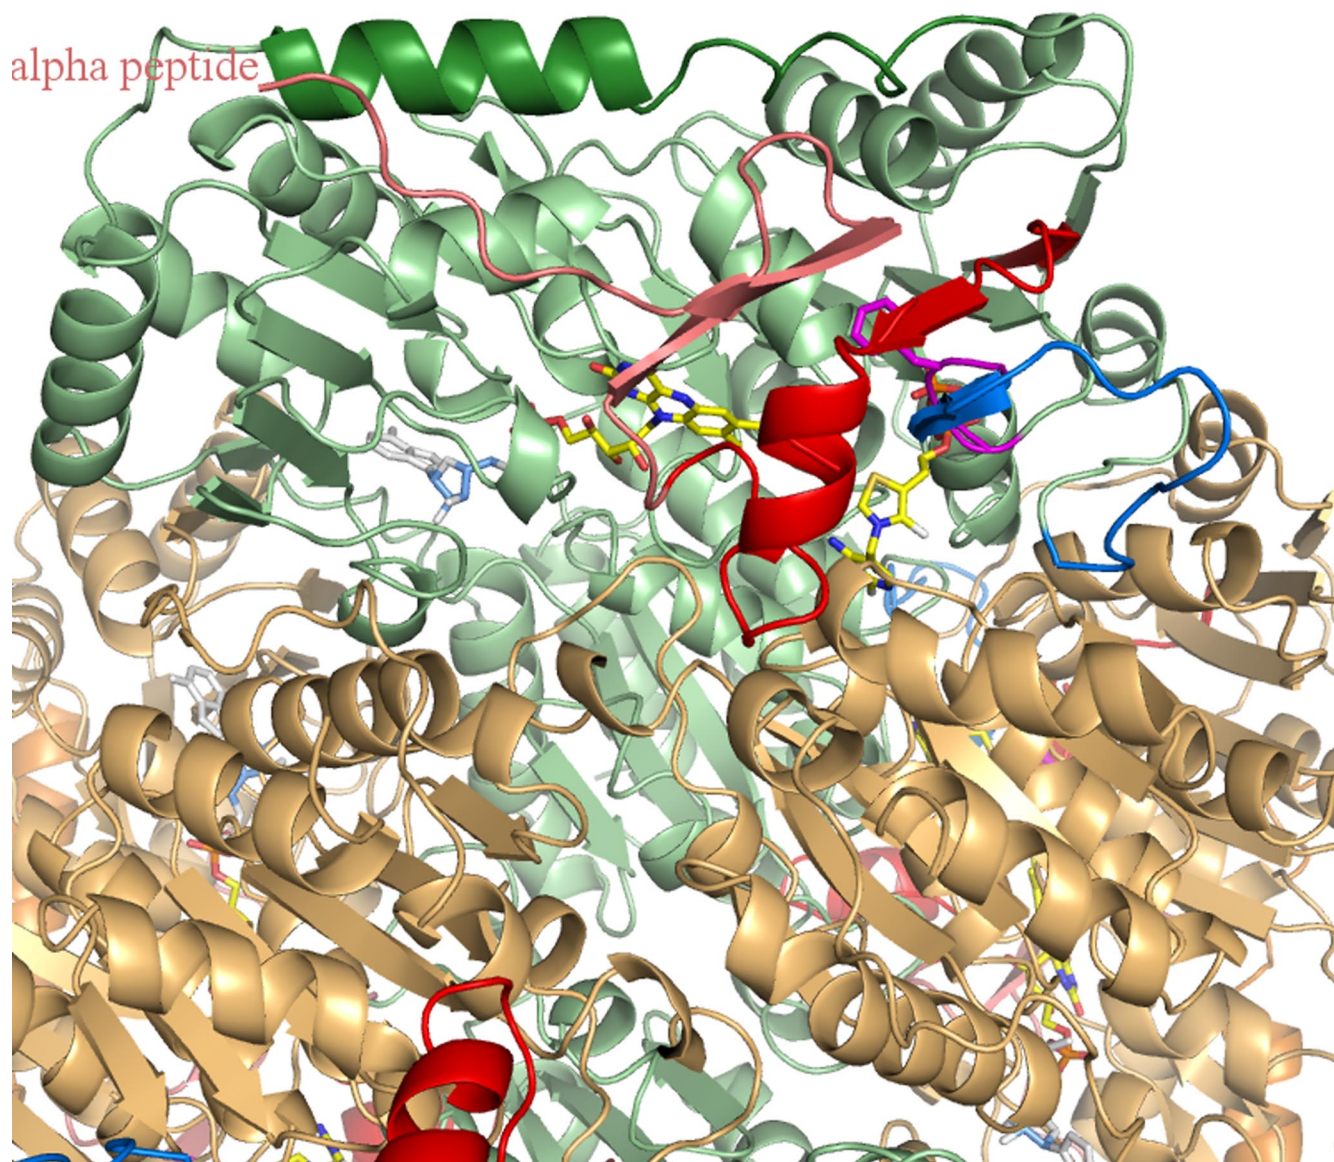

Movie S1. Structural transition of EcPOX in the course of activation.

[Movie S1 \(MOV\)](#)



Table S1. Crystallographic statistics

|                                    | Full-length EcPOX (1–572) | EcPOX <sub>Δ23</sub> (1–549) |
|------------------------------------|---------------------------|------------------------------|
| Data collection                    |                           |                              |
| Wavelength, Å                      | 1.54180                   | 0.91840                      |
| Space group, Å                     | P4(3)2(1)2                | P2(1)2(1)2(1)                |
| <i>a</i>                           | 151.36                    | 203.24                       |
| <i>b</i>                           | 151.36                    | 207.05                       |
| <i>c</i>                           | 153.74                    | 214.54                       |
| Monomers in asymmetric unit        | 2                         | 12                           |
| Max. resolution, Å                 | 2.9                       | 2.5                          |
| <i>R</i> <sub>merge</sub> , %      | 7.3 (74.4)                | 13.1 (70.8)                  |
| Completeness, %                    | 98.6 (99.6)               | 99.7 (98.5)                  |
| No. of reflections                 | 417728                    | 1610583                      |
| No. of unique reflections          | 39657                     | 309571                       |
| $\langle I/\sigma(I) \rangle$      | 25.07 (2.54)              | 20.75 (1.95)                 |
| Refinement                         |                           |                              |
| Resolution range, Å                | 30.0–2.9                  | 30.0–2.5                     |
| Completeness (working + test), %   | 98.79 (99.6)              | 99.62 (98.21)                |
| No. of reflections ( <i>F</i> > 0) | 39635                     | 294151                       |
| Wilson B, Å <sup>2</sup>           | 72.85                     | 60.20                        |
| <i>R</i> <sub>cryst</sub> , %      | 18.32 (32.53)             | 18.34 (27.50)                |
| <i>R</i> <sub>free</sub> , %       | 21.60 (37.90)             | 19.77 (29.20)                |
| No. of nonhydrogen atoms           |                           |                              |
| Protein                            | 8,684                     | 47,891                       |
| Water                              | 0                         | 1329                         |
| Sulfate/Phosphate                  | 10                        | 180                          |
| FAD, ThDP, Mg <sup>2+</sup>        | 160                       | 960                          |
| R.m.SD from ideality               |                           |                              |
| Bond lengths, Å                    | 0.007                     | 0.013                        |
| Bond angles, °                     | 1.129                     | 1.467                        |
| Dihedrals, °                       | 19.350                    | 22.895                       |
| Improper, °                        | 0.073                     | 0.095                        |
| Average B-factor, Å <sup>2</sup>   |                           |                              |
| Protein atoms                      | 81.00                     | 60.23                        |
| Water                              |                           | 55.34                        |
| Sulfate/Phosphate                  | 84.21                     | 73.96                        |
| FAD, ThDP, Mg <sup>2+</sup>        | 65.11                     | 51.00                        |

$R_{\text{merge}} = \sum |I - \langle I \rangle| / \sum \langle I \rangle$ . Values in parentheses correspond to the highest resolution shell.  $R_{\text{cryst}} = \sum ||F_{\text{obs}}| - |F_{\text{calc}}|| / \sum |F_{\text{obs}}|$ .  $R_{\text{free}}$  is calculated as for  $R_{\text{cryst}}$  but for a test set comprising reflections not used in the refinement (5.0%).
